# Supplementary material
Source: Royal Society of Chemistry journal article supplement (doi:10.1039/d5ta09558a)
Supplement: d5ta09558a3.pdf [file d5ta09558a3.pdf]

## Multifunctional $\text{Sb}_2\text{O}_3\text{-Bi}_2\text{O}_3$ Nano-Leaves for Record-High Supercapacitor Energy Density and Efficient HER and OER Catalysis

Zeenat A. Shaikh<sup>a</sup>, Siddheshwar D. Raut<sup>b</sup>, Hamdan M. Danamah<sup>c</sup>, Chetan Kamble<sup>d</sup>, Tariq M. Al-Hejri<sup>e</sup>, Arvind H Jadhav<sup>a\*</sup>, Rajaram S. Mane<sup>e\*</sup>

<sup>a</sup>Centre for Nano and Material Sciences (CNMS), Jain University Global Campus, Jakkasandra Post, Kanakpura Road, Ramanagaram Bangalore – 562112

<sup>b</sup>Department of Physics, Sharadchandra Arts, Commerce and Science College, Naigaon, Dist. Nanded 431709, Maharashtra, India

<sup>c</sup>Department of Materials Engineering, Laboratory of Processing of Technological Materials (LPMaT), Federal University of Amazonas, Faculty of Technology, Manaus 69067-005, Brazil

<sup>d</sup>Materials R&D, Naxnova Technologies Pvt. Ltd., 411033, Pune, Maharashtra, India

<sup>e</sup>Centre for Nanomaterials & Energy Devices, School of Physical Sciences, Swami Ramanand Teertha Marathwada University, Nanded-431606, M.S., India

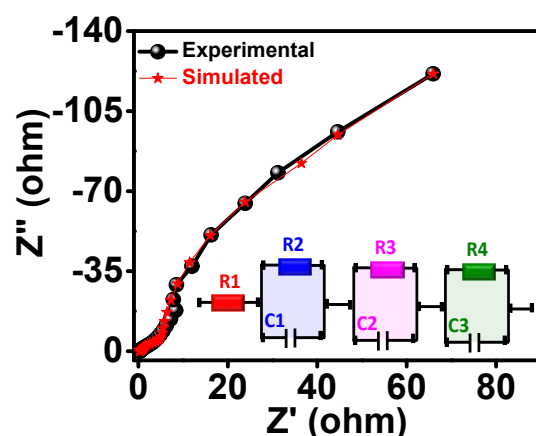

**Figure S1:** Nyquist plot of the AO–BiO electrode with experimental data and the corresponding fitted curve (red), obtained using the equivalent circuit shown in the inset.

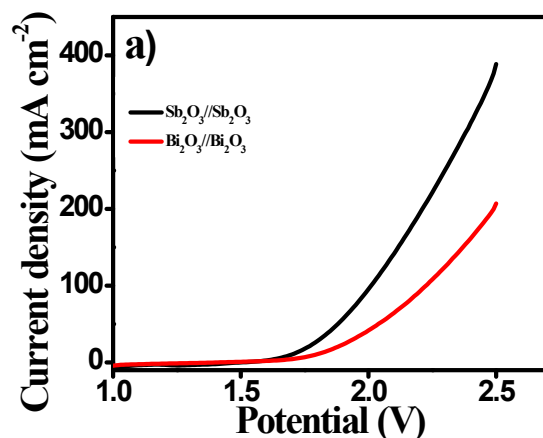

**Figure S2:** Two-electrode polarization curves at  $10 \text{ mA cm}^{-2}$  in  $3.0 \text{ M KOH}$  (without  $iR$  correction)

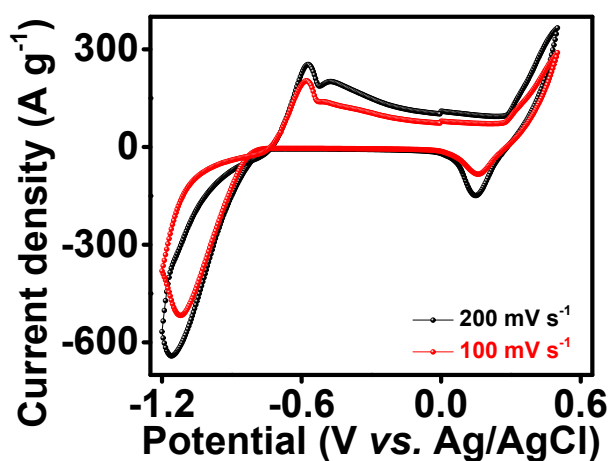

**Figure S3:** CV curves of AO–BiO electrode at 100 and 200 mV/s.

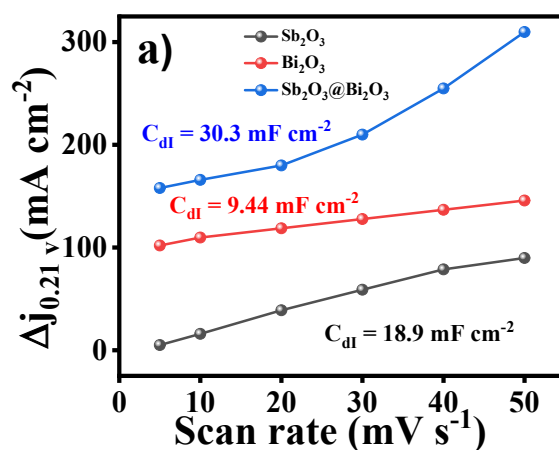

**Figure S4:** The corresponding capacitive current at  $0.21 \text{ V}$  as a function of the scan rate for  $\text{Sb}_2\text{O}_3$ ,  $\text{Bi}_2\text{O}_3$ , and  $\text{Sb}_2\text{O}_3@\text{Bi}_2\text{O}_3$  in  $3 \text{ M KOH}$

**Movie S1:** Demonstration of LED illumination powered by the fabricated supercapacitor device, highlighting its practical energy storage capability.

**Movie S2:** Video demonstration of hydrogen and oxygen bubble evolution during the hydrogen evolution reaction (HER) and oxygen evolution reaction (OER) tests, confirming the efficient electrocatalytic activity of the fabricated electrode.
